# Supplementary material
Source: publisher figshare collection journal article supplement (https://acs.figshare.com/ndownloader/files/4138219)
Supplement: Supplementary file 1 [file 4138219]

 
data_chan216s 
  
_audit_creation_method            SHELXL-97 
_chemical_name_systematic 
; 
 ? 
; 
_chemical_name_common             ? 
_chemical_melting_point           ? 
_chemical_formula_moiety          'C32 H24 O2'
_chemical_formula_sum 
 'C32 H24 O2' 
_chemical_formula_weight          440.51 
  
loop_ 
 _atom_type_symbol 
 _atom_type_description 
 _atom_type_scat_dispersion_real 
 _atom_type_scat_dispersion_imag 
 _atom_type_scat_source 
 'C'  'C'   0.0033   0.0016 
 'International Tables Vol C Tables 4.2.6.8 and 6.1.1.4' 
 'H'  'H'   0.0000   0.0000 
 'International Tables Vol C Tables 4.2.6.8 and 6.1.1.4' 
 'O'  'O'   0.0106   0.0060 
 'International Tables Vol C Tables 4.2.6.8 and 6.1.1.4' 
  
_symmetry_cell_setting            Monoclinic 
_symmetry_space_group_name_H-M    P2(1)/c 
  
loop_ 
 _symmetry_equiv_pos_as_xyz 
 'x, y, z' 
 '-x, y+1/2, -z+1/2' 
 '-x, -y, -z' 
 'x, -y-1/2, z-1/2' 
  
_cell_length_a                    11.8795(11) 
_cell_length_b                    15.5465(14) 
_cell_length_c                    13.6599(11) 
_cell_angle_alpha                 90.00 
_cell_angle_beta                  111.548(2) 
_cell_angle_gamma                 90.00 
_cell_volume                      2346.5(4) 
_cell_formula_units_Z             4 
_cell_measurement_temperature     153(2) 
_cell_measurement_reflns_used     1889 
_cell_measurement_theta_min       3.06 
_cell_measurement_theta_max       22.64 
  
_exptl_crystal_description        plate 
_exptl_crystal_colour             colourless 
_exptl_crystal_size_max           0.30 
_exptl_crystal_size_mid           0.30 
_exptl_crystal_size_min           0.08 
_exptl_crystal_density_meas       ? 
_exptl_crystal_density_diffrn     1.247 
_exptl_crystal_density_method     'not measured' 
_exptl_crystal_F_000              928 
_exptl_absorpt_coefficient_mu     0.076 
_exptl_absorpt_correction_type    multi-scan
_exptl_absorpt_correction_T_min   0.9775 
_exptl_absorpt_correction_T_max   0.9939 
_exptl_absorpt_process_details    sadabs 
  
_exptl_special_details 
; 
 ? 
; 
  
_diffrn_ambient_temperature       153(2) 
_diffrn_radiation_wavelength      0.71073 
_diffrn_radiation_type            MoK\a 
_diffrn_radiation_source          'fine-focus sealed tube' 
_diffrn_radiation_monochromator   graphite 
_diffrn_measurement_device_type   'Bruker APEX-II CCD' 
_diffrn_measurement_method        '\f and \w scans' 
_diffrn_detector_area_resol_mean  ? 
_diffrn_reflns_number             25015 
_diffrn_reflns_av_R_equivalents   0.0786 
_diffrn_reflns_av_sigmaI/netI     0.0815 
_diffrn_reflns_limit_h_min        -16 
_diffrn_reflns_limit_h_max        16 
_diffrn_reflns_limit_k_min        -21 
_diffrn_reflns_limit_k_max        21 
_diffrn_reflns_limit_l_min        -19 
_diffrn_reflns_limit_l_max        19 
_diffrn_reflns_theta_min          1.84 
_diffrn_reflns_theta_max          30.00 
_reflns_number_total              6831 
_reflns_number_gt                 3798 
_reflns_threshold_expression      >2sigma(I) 
  
_computing_data_collection        'Bruker APEX2' 
_computing_cell_refinement        'Bruker SAINT' 
_computing_data_reduction         'Bruker SAINT' 
_computing_structure_solution     'SHELXS-97 (Sheldrick, 2008)' 
_computing_structure_refinement   'SHELXL-97 (Sheldrick, 2008)' 
_computing_molecular_graphics     'Bruker SHELXTL' 
_computing_publication_material   'Bruker SHELXTL' 
  
_refine_special_details 
; 
 Refinement of F^2^ against ALL reflections.  The weighted R-factor wR and 
 goodness of fit S are based on F^2^, conventional R-factors R are based 
 on F, with F set to zero for negative F^2^. The threshold expression of 
 F^2^ > 2sigma(F^2^) is used only for calculating R-factors(gt) etc. and is 
 not relevant to the choice of reflections for refinement.  R-factors based 
 on F^2^ are statistically about twice as large as those based on F, and R- 
 factors based on ALL data will be even larger. 
; 
  
_refine_ls_structure_factor_coef  Fsqd 
_refine_ls_matrix_type            full 
_refine_ls_weighting_scheme       calc 
_refine_ls_weighting_details 
 'calc w=1/[\s^2^(Fo^2^)+(0.0884P)^2^+0.0000P] where P=(Fo^2^+2Fc^2^)/3' 
_atom_sites_solution_primary      direct 
_atom_sites_solution_secondary    difmap 
_atom_sites_solution_hydrogens    geom 
_refine_ls_hydrogen_treatment     constr
_refine_ls_extinction_method      none 
_refine_ls_extinction_coef        ? 
_refine_ls_number_reflns          6831 
_refine_ls_number_parameters      308 
_refine_ls_number_restraints      0 
_refine_ls_R_factor_all           0.1169 
_refine_ls_R_factor_gt            0.0533 
_refine_ls_wR_factor_ref          0.1802 
_refine_ls_wR_factor_gt           0.1275 
_refine_ls_goodness_of_fit_ref    0.989 
_refine_ls_restrained_S_all       0.989 
_refine_ls_shift/su_max           0.000 
_refine_ls_shift/su_mean          0.000 
  
loop_ 
 _atom_site_label 
 _atom_site_type_symbol 
 _atom_site_fract_x 
 _atom_site_fract_y 
 _atom_site_fract_z 
 _atom_site_U_iso_or_equiv 
 _atom_site_adp_type 
 _atom_site_occupancy 
 _atom_site_symmetry_multiplicity 
 _atom_site_calc_flag 
 _atom_site_refinement_flags 
 _atom_site_disorder_assembly 
 _atom_site_disorder_group 
C1 C 0.20341(19) 0.30860(14) 0.14972(16) 0.0334(5) Uani 1 1 d . . . 
H1A H 0.2862 0.3133 0.1510 0.050 Uiso 1 1 calc R . . 
H1B H 0.1467 0.3323 0.0835 0.050 Uiso 1 1 calc R . . 
H1C H 0.1841 0.2480 0.1554 0.050 Uiso 1 1 calc R . . 
C2 C 0.19315(16) 0.35723(13) 0.23924(15) 0.0245(4) Uani 1 1 d . . . 
C3 C 0.17829(15) 0.33481(13) 0.32964(15) 0.0250(4) Uani 1 1 d . . . 
C4 C 0.17163(15) 0.41437(13) 0.38131(14) 0.0236(4) Uani 1 1 d . . . 
C5 C 0.18150(15) 0.47981(13) 0.31848(14) 0.0242(4) Uani 1 1 d . . . 
C6 C 0.16918(15) 0.57304(13) 0.31849(14) 0.0242(4) Uani 1 1 d . . . 
C7 C 0.11523(16) 0.61273(14) 0.38223(15) 0.0274(4) Uani 1 1 d . . . 
H7 H 0.0909 0.5791 0.4292 0.033 Uiso 1 1 calc R . . 
C8 C 0.09721(17) 0.70080(14) 0.37698(16) 0.0313(5) Uani 1 1 d . . . 
H8 H 0.0611 0.7273 0.4209 0.038 Uiso 1 1 calc R . . 
C9 C 0.13095(18) 0.75059(14) 0.30884(17) 0.0344(5) Uani 1 1 d . . . 
H9 H 0.1180 0.8110 0.3055 0.041 Uiso 1 1 calc R . . 
C10 C 0.18394(19) 0.71162(15) 0.24548(17) 0.0360(5) Uani 1 1 d . . . 
H10 H 0.2070 0.7456 0.1981 0.043 Uiso 1 1 calc R . . 
C11 C 0.20371(17) 0.62410(14) 0.25019(16) 0.0304(5) Uani 1 1 d . . . 
H11 H 0.2410 0.5984 0.2067 0.036 Uiso 1 1 calc R . . 
C12 C 0.15858(17) 0.41968(14) 0.48519(16) 0.0291(4) Uani 1 1 d . . . 
C13 C 0.25196(18) 0.46701(14) 0.57261(15) 0.0304(5) Uani 1 1 d . . . 
C14 C 0.36923(19) 0.47640(15) 0.57497(17) 0.0361(5) Uani 1 1 d . . . 
H14 H 0.3899 0.4557 0.5183 0.043 Uiso 1 1 calc R . . 
C15 C 0.4556(2) 0.51595(17) 0.65988(19) 0.0500(7) Uani 1 1 d . . . 
H15 H 0.5366 0.5204 0.6630 0.060 Uiso 1 1 calc R . . 
C16 C 0.4246(3) 0.54908(17) 0.74034(19) 0.0566(8) Uani 1 1 d . . . 
H16 H 0.4840 0.5775 0.7978 0.068 Uiso 1 1 calc R . . 
C17 C 0.3083(3) 0.54105(17) 0.73759(18) 0.0532(7) Uani 1 1 d . . . 
H17 H 0.2871 0.5645 0.7928 0.064 Uiso 1 1 calc R . . 
C18 C 0.2222(2) 0.49907(15) 0.65493(16) 0.0409(6) Uani 1 1 d . . . 
H18 H 0.1425 0.4920 0.6542 0.049 Uiso 1 1 calc R . . 
C19 C 0.16988(16) 0.24747(13) 0.36694(14) 0.0259(4) Uani 1 1 d . . . 
H19 H 0.0966 0.2314 0.3750 0.031 Uiso 1 1 calc R . . 
C20 C 0.25830(15) 0.18884(13) 0.39041(14) 0.0232(4) Uani 1 1 d . . . 
C21 C 0.24225(15) 0.09975(13) 0.42122(14) 0.0235(4) Uani 1 1 d . . . 
C22 C 0.12735(17) 0.06205(14) 0.38979(16) 0.0316(5) Uani 1 1 d . . . 
H22 H 0.0588 0.0931 0.3454 0.038 Uiso 1 1 calc R . . 
C23 C 0.11256(19) -0.01938(15) 0.42238(17) 0.0373(5) Uani 1 1 d . . . 
H23 H 0.0338 -0.0437 0.4012 0.045 Uiso 1 1 calc R . . 
C24 C 0.21168(19) -0.06636(14) 0.48594(16) 0.0346(5) Uani 1 1 d . . . 
H24 H 0.2011 -0.1226 0.5083 0.041 Uiso 1 1 calc R . . 
C25 C 0.32598(19) -0.03072(14) 0.51655(16) 0.0329(5) Uani 1 1 d . . . 
H25 H 0.3944 -0.0626 0.5597 0.039 Uiso 1 1 calc R . . 
C26 C 0.34079(17) 0.05147(13) 0.48430(15) 0.0277(4) Uani 1 1 d . . . 
H26 H 0.4198 0.0754 0.5056 0.033 Uiso 1 1 calc R . . 
C27 C 0.38115(15) 0.21363(12) 0.39423(14) 0.0243(4) Uani 1 1 d . . . 
C28 C 0.42511(17) 0.18792(13) 0.31812(16) 0.0279(4) Uani 1 1 d . . . 
H28 H 0.3775 0.1517 0.2623 0.033 Uiso 1 1 calc R . . 
C29 C 0.53857(17) 0.21476(15) 0.32268(17) 0.0331(5) Uani 1 1 d . . . 
H29 H 0.5672 0.1981 0.2691 0.040 Uiso 1 1 calc R . . 
C30 C 0.60937(17) 0.26543(15) 0.40492(18) 0.0365(5) Uani 1 1 d . . . 
H30 H 0.6868 0.2839 0.4078 0.044 Uiso 1 1 calc R . . 
C31 C 0.56838(18) 0.28937(15) 0.48276(18) 0.0380(5) Uani 1 1 d . . . 
H31 H 0.6182 0.3232 0.5402 0.046 Uiso 1 1 calc R . . 
C32 C 0.45469(17) 0.26428(14) 0.47756(16) 0.0325(5) Uani 1 1 d . . . 
H32 H 0.4264 0.2817 0.5311 0.039 Uiso 1 1 calc R . . 
O1 O 0.19503(11) 0.44563(9) 0.23069(10) 0.0257(3) Uani 1 1 d . . . 
O2 O 0.07560(14) 0.38230(11) 0.49895(13) 0.0434(4) Uani 1 1 d . . . 
  
loop_ 
 _atom_site_aniso_label 
 _atom_site_aniso_U_11 
 _atom_site_aniso_U_22 
 _atom_site_aniso_U_33 
 _atom_site_aniso_U_23 
 _atom_site_aniso_U_13 
 _atom_site_aniso_U_12 
C1 0.0402(11) 0.0359(12) 0.0250(10) -0.0007(9) 0.0129(9) 0.0022(9) 
C2 0.0240(8) 0.0268(10) 0.0229(9) 0.0005(8) 0.0087(7) 0.0028(7) 
C3 0.0209(8) 0.0324(11) 0.0210(9) 0.0021(8) 0.0069(7) 0.0023(7) 
C4 0.0178(7) 0.0321(11) 0.0210(9) 0.0007(8) 0.0072(7) 0.0014(7) 
C5 0.0223(8) 0.0329(11) 0.0194(9) -0.0008(8) 0.0100(7) 0.0004(8) 
C6 0.0183(8) 0.0315(11) 0.0215(9) -0.0002(8) 0.0056(7) 0.0000(7) 
C7 0.0231(8) 0.0359(12) 0.0239(9) 0.0018(9) 0.0093(7) 0.0011(8) 
C8 0.0261(9) 0.0374(12) 0.0308(11) -0.0041(10) 0.0107(8) 0.0038(8) 
C9 0.0310(10) 0.0291(12) 0.0406(12) -0.0020(10) 0.0103(9) 0.0005(8) 
C10 0.0391(11) 0.0355(13) 0.0367(12) 0.0033(10) 0.0179(10) -0.0057(9) 
C11 0.0308(9) 0.0350(12) 0.0288(10) -0.0016(9) 0.0150(8) -0.0036(9) 
C12 0.0305(9) 0.0346(12) 0.0263(10) 0.0028(9) 0.0151(8) 0.0052(8) 
C13 0.0400(11) 0.0304(12) 0.0200(9) 0.0066(9) 0.0104(8) 0.0057(9) 
C14 0.0384(11) 0.0421(14) 0.0242(10) 0.0037(10) 0.0073(9) 0.0003(10) 
C15 0.0482(13) 0.0519(16) 0.0362(13) 0.0076(12) -0.0006(11) -0.0078(12) 
C16 0.086(2) 0.0400(15) 0.0234(12) 0.0031(11) -0.0033(13) -0.0084(14) 
C17 0.090(2) 0.0433(16) 0.0227(11) 0.0012(11) 0.0163(13) 0.0087(14) 
C18 0.0603(14) 0.0409(14) 0.0236(10) 0.0052(10) 0.0179(10) 0.0097(11) 
C19 0.0231(8) 0.0341(11) 0.0220(9) 0.0021(8) 0.0101(7) -0.0001(8) 
C20 0.0231(8) 0.0306(11) 0.0149(8) -0.0018(8) 0.0059(7) -0.0009(7) 
C21 0.0241(8) 0.0307(11) 0.0162(8) -0.0026(8) 0.0080(7) 0.0007(8) 
C22 0.0271(9) 0.0333(12) 0.0288(10) -0.0003(9) 0.0037(8) -0.0004(8) 
C23 0.0313(10) 0.0404(13) 0.0363(12) -0.0043(11) 0.0079(9) -0.0105(9) 
C24 0.0426(11) 0.0322(12) 0.0283(11) 0.0017(10) 0.0124(9) -0.0051(9) 
C25 0.0356(10) 0.0360(12) 0.0247(10) 0.0041(9) 0.0082(8) 0.0039(9) 
C26 0.0262(9) 0.0330(11) 0.0230(9) 0.0017(9) 0.0079(7) 0.0004(8) 
C27 0.0226(8) 0.0261(10) 0.0226(9) 0.0029(8) 0.0065(7) 0.0018(7) 
C28 0.0277(9) 0.0298(11) 0.0264(10) 0.0008(9) 0.0102(8) 0.0026(8) 
C29 0.0286(9) 0.0405(13) 0.0330(11) 0.0063(10) 0.0148(9) 0.0065(9) 
C30 0.0221(9) 0.0387(13) 0.0477(13) 0.0098(11) 0.0116(9) 0.0012(8) 
C31 0.0257(9) 0.0433(14) 0.0389(12) -0.0052(11) 0.0044(9) -0.0043(9) 
C32 0.0263(9) 0.0399(13) 0.0294(11) -0.0060(10) 0.0080(8) -0.0003(9) 
O1 0.0283(6) 0.0314(8) 0.0196(6) -0.0002(6) 0.0113(5) 0.0014(6) 
O2 0.0464(9) 0.0551(11) 0.0408(9) -0.0009(8) 0.0302(8) -0.0076(8) 
  
_geom_special_details 
; 
 All esds (except the esd in the dihedral angle between two l.s. planes) 
 are estimated using the full covariance matrix.  The cell esds are taken 
 into account individually in the estimation of esds in distances, angles 
 and torsion angles; correlations between esds in cell parameters are only 
 used when they are defined by crystal symmetry.  An approximate (isotropic) 
 treatment of cell esds is used for estimating esds involving l.s. planes. 
; 
  
loop_ 
 _geom_bond_atom_site_label_1 
 _geom_bond_atom_site_label_2 
 _geom_bond_distance 
 _geom_bond_site_symmetry_2 
 _geom_bond_publ_flag 
C1 C2 1.480(3) . ? 
C1 H1A 0.9800 . ? 
C1 H1B 0.9800 . ? 
C1 H1C 0.9800 . ? 
C2 C3 1.356(3) . ? 
C2 O1 1.380(2) . ? 
C3 C4 1.441(3) . ? 
C3 C19 1.467(3) . ? 
C4 C5 1.364(3) . ? 
C4 C12 1.485(3) . ? 
C5 O1 1.374(2) . ? 
C5 C6 1.457(3) . ? 
C6 C11 1.396(3) . ? 
C6 C7 1.400(3) . ? 
C7 C8 1.384(3) . ? 
C7 H7 0.9500 . ? 
C8 C9 1.378(3) . ? 
C8 H8 0.9500 . ? 
C9 C10 1.383(3) . ? 
C9 H9 0.9500 . ? 
C10 C11 1.378(3) . ? 
C10 H10 0.9500 . ? 
C11 H11 0.9500 . ? 
C12 O2 1.217(2) . ? 
C12 C13 1.492(3) . ? 
C13 C18 1.389(3) . ? 
C13 C14 1.389(3) . ? 
C14 C15 1.379(3) . ? 
C14 H14 0.9500 . ? 
C15 C16 1.380(4) . ? 
C15 H15 0.9500 . ? 
C16 C17 1.375(4) . ? 
C16 H16 0.9500 . ? 
C17 C18 1.378(3) . ? 
C17 H17 0.9500 . ? 
C18 H18 0.9500 . ? 
C19 C20 1.338(3) . ? 
C19 H19 0.9500 . ? 
C20 C21 1.480(3) . ? 
C20 C27 1.492(2) . ? 
C21 C26 1.391(3) . ? 
C21 C22 1.400(3) . ? 
C22 C23 1.375(3) . ? 
C22 H22 0.9500 . ? 
C23 C24 1.387(3) . ? 
C23 H23 0.9500 . ? 
C24 C25 1.382(3) . ? 
C24 H24 0.9500 . ? 
C25 C26 1.384(3) . ? 
C25 H25 0.9500 . ? 
C26 H26 0.9500 . ? 
C27 C28 1.383(3) . ? 
C27 C32 1.396(3) . ? 
C28 C29 1.390(3) . ? 
C28 H28 0.9500 . ? 
C29 C30 1.377(3) . ? 
C29 H29 0.9500 . ? 
C30 C31 1.373(3) . ? 
C30 H30 0.9500 . ? 
C31 C32 1.382(3) . ? 
C31 H31 0.9500 . ? 
C32 H32 0.9500 . ? 
  
loop_ 
 _geom_angle_atom_site_label_1 
 _geom_angle_atom_site_label_2 
 _geom_angle_atom_site_label_3 
 _geom_angle 
 _geom_angle_site_symmetry_1 
 _geom_angle_site_symmetry_3 
 _geom_angle_publ_flag 
C2 C1 H1A 109.5 . . ? 
C2 C1 H1B 109.5 . . ? 
H1A C1 H1B 109.5 . . ? 
C2 C1 H1C 109.5 . . ? 
H1A C1 H1C 109.5 . . ? 
H1B C1 H1C 109.5 . . ? 
C3 C2 O1 110.16(17) . . ? 
C3 C2 C1 134.35(19) . . ? 
O1 C2 C1 115.46(17) . . ? 
C2 C3 C4 105.93(18) . . ? 
C2 C3 C19 127.07(18) . . ? 
C4 C3 C19 127.00(17) . . ? 
C5 C4 C3 107.42(17) . . ? 
C5 C4 C12 128.55(18) . . ? 
C3 C4 C12 124.02(18) . . ? 
C4 C5 O1 108.99(17) . . ? 
C4 C5 C6 135.27(18) . . ? 
O1 C5 C6 115.40(16) . . ? 
C11 C6 C7 118.62(19) . . ? 
C11 C6 C5 120.75(18) . . ? 
C7 C6 C5 120.51(18) . . ? 
C8 C7 C6 120.09(19) . . ? 
C8 C7 H7 120.0 . . ? 
C6 C7 H7 120.0 . . ? 
C9 C8 C7 120.9(2) . . ? 
C9 C8 H8 119.6 . . ? 
C7 C8 H8 119.6 . . ? 
C8 C9 C10 119.3(2) . . ? 
C8 C9 H9 120.4 . . ? 
C10 C9 H9 120.4 . . ? 
C11 C10 C9 120.8(2) . . ? 
C11 C10 H10 119.6 . . ? 
C9 C10 H10 119.6 . . ? 
C10 C11 C6 120.4(2) . . ? 
C10 C11 H11 119.8 . . ? 
C6 C11 H11 119.8 . . ? 
O2 C12 C4 119.72(19) . . ? 
O2 C12 C13 121.22(18) . . ? 
C4 C12 C13 118.97(17) . . ? 
C18 C13 C14 119.6(2) . . ? 
C18 C13 C12 119.31(19) . . ? 
C14 C13 C12 121.00(19) . . ? 
C15 C14 C13 119.7(2) . . ? 
C15 C14 H14 120.1 . . ? 
C13 C14 H14 120.1 . . ? 
C14 C15 C16 120.2(3) . . ? 
C14 C15 H15 119.9 . . ? 
C16 C15 H15 119.9 . . ? 
C17 C16 C15 120.2(2) . . ? 
C17 C16 H16 119.9 . . ? 
C15 C16 H16 119.9 . . ? 
C16 C17 C18 120.1(2) . . ? 
C16 C17 H17 120.0 . . ? 
C18 C17 H17 120.0 . . ? 
C17 C18 C13 120.1(2) . . ? 
C17 C18 H18 120.0 . . ? 
C13 C18 H18 120.0 . . ? 
C20 C19 C3 124.50(17) . . ? 
C20 C19 H19 117.8 . . ? 
C3 C19 H19 117.8 . . ? 
C19 C20 C21 122.26(16) . . ? 
C19 C20 C27 120.30(18) . . ? 
C21 C20 C27 117.28(16) . . ? 
C26 C21 C22 117.89(19) . . ? 
C26 C21 C20 120.94(16) . . ? 
C22 C21 C20 121.16(16) . . ? 
C23 C22 C21 120.82(18) . . ? 
C23 C22 H22 119.6 . . ? 
C21 C22 H22 119.6 . . ? 
C22 C23 C24 120.51(19) . . ? 
C22 C23 H23 119.7 . . ? 
C24 C23 H23 119.7 . . ? 
C25 C24 C23 119.5(2) . . ? 
C25 C24 H24 120.2 . . ? 
C23 C24 H24 120.2 . . ? 
C24 C25 C26 119.99(19) . . ? 
C24 C25 H25 120.0 . . ? 
C26 C25 H25 120.0 . . ? 
C25 C26 C21 121.26(18) . . ? 
C25 C26 H26 119.4 . . ? 
C21 C26 H26 119.4 . . ? 
C28 C27 C32 118.68(17) . . ? 
C28 C27 C20 122.27(17) . . ? 
C32 C27 C20 119.05(17) . . ? 
C27 C28 C29 120.48(19) . . ? 
C27 C28 H28 119.8 . . ? 
C29 C28 H28 119.8 . . ? 
C30 C29 C28 120.0(2) . . ? 
C30 C29 H29 120.0 . . ? 
C28 C29 H29 120.0 . . ? 
C31 C30 C29 120.17(19) . . ? 
C31 C30 H30 119.9 . . ? 
C29 C30 H30 119.9 . . ? 
C30 C31 C32 120.1(2) . . ? 
C30 C31 H31 120.0 . . ? 
C32 C31 H31 120.0 . . ? 
C31 C32 C27 120.5(2) . . ? 
C31 C32 H32 119.7 . . ? 
C27 C32 H32 119.7 . . ? 
C5 O1 C2 107.49(15) . . ? 
  
_diffrn_measured_fraction_theta_max    0.999 
_diffrn_reflns_theta_full              30.00 
_diffrn_measured_fraction_theta_full   0.999 
_refine_diff_density_max    0.264 
_refine_diff_density_min   -0.285 
_refine_diff_density_rms    0.073 
